# Supplementary material
Source: HighWire-hosted journal article supplement (http://www.ajnr.org/highwire/filestream/79577/field_highwire_adjunct_files/0/20-00059.pdf)
Supplement: 20-00059.pdf [file 20-00059.pdf]

**On-line Table 1: T1ρ measurements of normal tissue, NPC, and benign hyperplasia<sup>a</sup>**

| T1ρ Measurements | Benign Hyperplasia (n = 41) |                      | Normal Brain (n = 41) | Normal Muscle (n = 41) | Normal Parotid Gland (n = 41) | P Value (NPC vs Benign Hyperplasia) | P Value (NPC vs Brain) | P Value (NPC vs Muscle) | P Value (NPC vs Parotid) |
|------------------|-----------------------------|----------------------|-----------------------|------------------------|-------------------------------|-------------------------------------|------------------------|-------------------------|--------------------------|
|                  | NPC (n = 43)                | Hyperplasia (n = 41) |                       |                        |                               |                                     |                        |                         |                          |
| Mean (ms)        | 62.14 (60.08–65.66)         | 65.45 (64.03–67.86)  | 73.33 (72.71–74.24)   | 35.62 (34.22–37.17)    | 53.14 (49.98–58.40)           | .001                                | <.001                  | <.001                   | <.001                    |
| SD (ms)          | 12.60 (11.96–13.61)         | 17.73 (15.98–19.27)  | 9.47 (8.99–10.07)     | 4.97 (4.30–5.44)       | 10.72 (9.33–12.34)            | .001                                | .001                   | .001                    | .001                     |
| Skewness         | 0.61 (0.46–0.78)            | 0.76 (0.63–1.22)     | -0.02 (-0.14–0.10)    | 0.83 (0.55–1.00)       | 0.70 (0.47–0.90)              | .001                                | .001                   | .005                    | .76                      |
| Kurtosis         | 3.55 (3.15–4.13)            | 3.80 (3.23–6.06)     | 2.54 (2.38–2.65)      | 3.90 (3.23–4.96)       | 3.58 (2.95–4.17)              | .18                                 | .001                   | .02                     | .35                      |

<sup>a</sup> Data are median values; data in parentheses are interquartile range. P values < .05 indicate statistical significance.

**On-line Table 2: Intra- and interobserver agreement between 2 observers for T1ρ measurements<sup>a</sup>**

| T1ρ measurements | Observer 1 Measurement |                     | Observer 1 Average  | Observer 2          | Intraobserver Agreement (ICC) | Interobserver Agreement (ICC) |
|------------------|------------------------|---------------------|---------------------|---------------------|-------------------------------|-------------------------------|
|                  | Measurement 1          | Measurement 2       |                     |                     |                               |                               |
| Mean (ms)        | 62.94 (51.18–70.57)    | 61.45 (50.78–69.20) | 62.07 (51.18–69.68) | 61.83 (50.11–68.21) | 0.99 (0.99–1.00) <sup>b</sup> | 0.99 (0.98–0.99) <sup>b</sup> |
| SD (ms)          | 10.44 (8.54–13.69)     | 10.25 (8.45–14.39)  | 10.34 (8.57–14.04)  | 10.72 (8.60–13.97)  | 0.98 (0.97–0.98) <sup>b</sup> | 0.96 (0.95–0.97) <sup>b</sup> |
| Skewness         | 0.54 (0.68–0.80)       | 0.61 (0.32–0.88)    | 0.59 (0.34–0.83)    | 0.64 (0.27–0.92)    | 0.88 (0.84–0.91) <sup>b</sup> | 0.81 (0.75–0.86) <sup>b</sup> |
| Kurtosis         | 3.23 (2.63–4.05)       | 3.42 (2.77–4.13)    | 3.34 (2.81–4.02)    | 3.40 (2.75–4.43)    | 0.80 (0.75–0.86) <sup>b</sup> | 0.56 (0.42–0.66) <sup>b</sup> |

**Note:**—ICC indicates intraclass correlation coefficient.

<sup>a</sup> Unless otherwise indicated, data are median values; data in parentheses are interquartile range.

<sup>b</sup> Data in parentheses in the last 2 columns are 95% confidence intervals.
